# Supplementary figures and images for: PLP/DM20 ratio is regulated by hnRNPH and F and a novel G-rich enhancer in oligodendrocytes
Source: PubMed Central journal article supplement — Nucleic Acids Res. 2007 Jun 12;35(12):4164–78. doi: 10.1093/nar/gkm387 (PMC1919487; doi:10.1093/nar/gkm387), 2007-06-12

**A.**

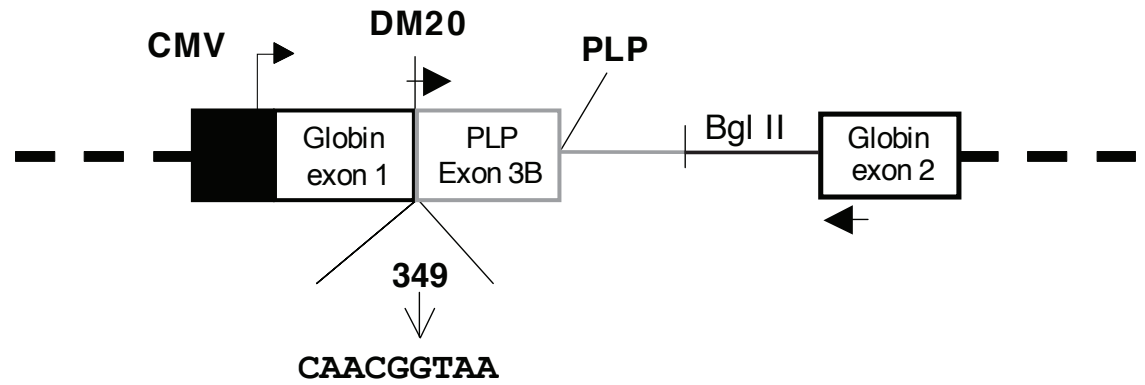

**B.**

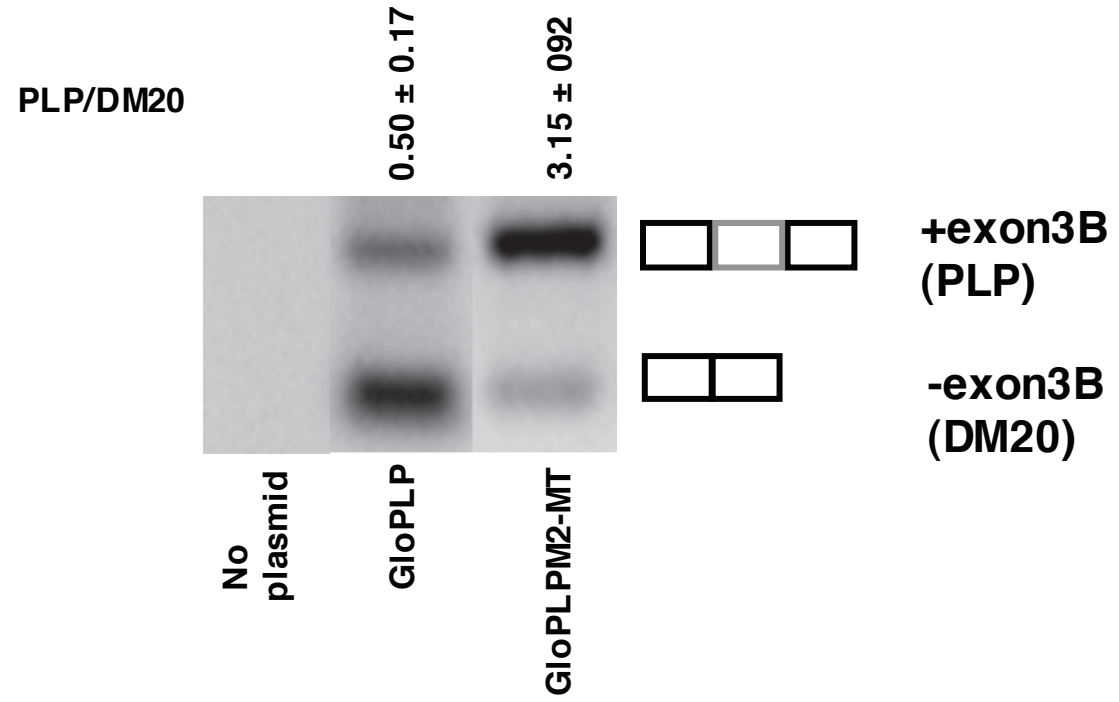

Supplement: nar_gkm387_2.pdf [file nar_gkm387_2.pdf]
